# Supplementary material
Source: publisher site journal article supplement (https://www.dovepress.com/article/590502)
Supplement: Supplementary file 1 [file Supplementary%20Table%20S1.docx]

**Supplementary Table S1. Individual methodological quality assessment of the included studies**

| Author (Year) | Study Design | Quality Tool | Overall Rating | Key concerns / domains with issues | Comments / Notes |
| --- | --- | --- | --- | --- | --- |
| Narula et al. 2016  (42) | Diagnostic Study | NOS | Good (7/9) | Comparability (1 star), limited external validation | Strong diagnostic focus but needs broader validation. |
| Weng et al. 2017  (28) | Retrospective cohort | NOS | Good (8/9) | Outcome assessment, selection bias | Large dataset, good comparability. |
| Krittanawong et al.  2017  (43) | Review | AMSTAR 2 | Moderate | Heterogeneity of included studies, incomplete reporting | Provides framework but limited to literature synthesis. |
| Madani et al. 2018  (21) | Retrospective | NOS | Good (8/9) | Blinding of outcome assessment | High accuracy in imaging. |
| Dimopoulos et al.  2018  (44) | Prospective cohort | NOS | Moderate (6/9) | Comparability (1 star), attrition | Long-term follow-up but sample attrition noted. |
| Steinhubl et al.  2018  (34) | RCT | RoB 2 | Low risk | Minor concerns in blinding of outcome assessment | Pragmatic RCT with strong randomization. |
| Alaa et al. 2019  (11) | Prospective cohort | NOS | Good (7/9) | Selection, external validation | Large biobank cohort. |
| Attia et al. 2019  (29) | Retrospective Analysis | NOS | Moderate (6/9) | Comparability, racial bias noted | Bias in subgroup performance highlighted. |
| Topol  2019  (13) | Narrative review | AMSTAR 2 | Good | No major concerns | Comprehensive narrative on AI in medicine. |
| Oikonomou et al.  2019  (45) | Multicohort Study | NOS | Good (7/9) | Outcome ascertainment | Multi-cohort strengthens generalizability. |
| Krittanawong et al.  2020  (10) | Meta-analysis | AMSTAR 2 | Moderate | Publication bias, heterogeneity | Pooled AUC high but heterogeneity limits. |
| Sengupta et al.  2020  (46) | Retrospective Cohort | NOS | Good (8/9) | Blinding, external validation | Predictive for HF hospitalization. |
| Ouyang et al. 2020  (26) | Prospective | NOS | Good (7/9) | Sample size, outcome assessment | Real-time analysis strong. |
| Noseworthy et al.  2020  (23) | Retrospective Cohort Study | NOS | Moderate (6/9) | Selection bias, racial subgroup performance | Addresses bias explicitly. |
| Ghorbani et al.  2020  (47) | Prospective | NOS | Good (8/9) | External validation | Automated EF estimation reliable. |
| Raita et al. 2021  (48) | Retrospective cohort | NOS | Good (7/9) | Data imbalance, comparability | Improved over pooled equations. |
| Raghunath et al.  2021  (22) | Cohort Study | NOS | Good (8/9) | No major concerns | Early AF prediction. |
| Aragam et al. 2022  (39) | GWAS and meta-analysis | AMSTAR 2 | Moderate | Generalizability, population bias | Large participant base but ethnic bias. |
| Khurshid et al.  2022  (49) | Cohort Study | NOS | Good (7/9) | Comparability, external validation | Integrated ECG and clinical data. |
| Mariani et al. 2023  (50) | Prospective diagnostic validation | NOS | Moderate (6/9) | Inconclusive tracings, selection | Wearable AF detection with physician oversight. |
| Subramani et al.  2023  (51) | Retrospective | NOS | Good (8/9) | Data imbalance | High accuracy with SHAP interpretability. |
| Wehbe et al. 2023  (32) | Systematic Review | AMSTAR 2 | Moderate | Incomplete reporting, heterogeneity | Focus on DL in imaging. |
| Perez et al. 2023  (40) | Prospective, single-group | NOS | Good (7/9) | Sample size, generalizability | PPG for AF detection. |
| Hu et al.  2023  (52) | Systematic review and meta-analysis | AMSTAR 2 | Good | Publication bias | Retinal images for CVD. |
| Yuan et al. 2023  (53) | Cohort Study | NOS | Moderate (6/9) | External validation | Veteran cohort for AF. |
| Ding et al. 2023  (54) | Model Development | NOS | Good (7/9) | Data augmentation limitations | GAN-based improvement. |
| Oikonomou & Khera 2023  (55) | Comprehensive Review | AMSTAR 2 | Good | No major concerns | Multimodal in diabetes/CVD. |
| Cicek et al. 2024  (30) | Meta-analysis | AMSTAR 2 | Moderate | Publication bias | SPECT for CAD. |
| Weiss et al. 2024  (56) | Risk prediction study | NOS | Good (7/9) | Comparability | CXR for MACE. |
| Mohan et al. 2024  (57) | Experimental | NOS | Good (8/9) | Sample size | High diagnostic performance. |
| Teshale et al. 2024  (58) | Systematic review | AMSTAR 2 | Moderate | Incomplete reporting | DL survival models. |
| Cai et al. 2024  (33) | Systematic review | AMSTAR 2 | Good | Bias assessment | Pitfalls in AI-CVD. |
| Johnson et al. 2024  (59) | Systematic review | AMSTAR 2 | Good | Heterogeneity | ML in EHR for CVD. |
| Alghamdi et al.  2024  (60) | Prospective cohort | NOS | Moderate (6/9) | Attrition | UK Biobank scalability. |
| Alghamdi S et al.  2024  (61) | Observational | NOS | Good (7/9) | Selection bias | High accuracy with SHAP. |
| Jiang et al. 2024  (62) | Predictive Model Development | NOS | Good (8/9) | Generalizability | HF readmission. |
| Kim et al. 2024  (19) | Model Development & Validation | NOS | Moderate (6/9) | External validation | DL for HF rehospitalization. |
| Liu et al. 2025  (12) | Systematic review and meta-analysis | AMSTAR 2 | Good | Publication bias | ML in EHR for CVD. |
| Liu et al. 2025  (17) | Systematic review | AMSTAR 2 | Good | Heterogeneity | Bias in ML models. |
| Rehman et al. 2025  (63) | Retrospective | NOS | Moderate (6/9) | Data imbalance | PSO-ANN for CHD. |
| Karim et al. 2025  (64) | Retrospective series | NOS | Good (7/9) | Sample size | DCNN for OMI. |
| Mahmoudi et al. 2025  (65) | Cohort / Experimental | NOS | Good (8/9) | Comparability | XAI for interpretability. |
| Sehgal et al. 2025  (66) | Review / Population | AMSTAR 2 | Moderate | Incomplete reporting | AI in population health. |
| Li et al.  2025  (67) | Experimental | NOS | Good (7/9) | Bias assessment | DL for heart disease. |
| Shojaei et al. 2025  (68) | Systematic Review and Meta-Analysis | AMSTAR 2 | Good | Heterogeneity | AI in TAVR outcomes. |
| Bdir et al. 2025  (69) | Scoping Review | AMSTAR 2 | Moderate | Publication bias, generalizability | MI detection via ECG. |
| Majumder et al.  2025  (70) | Narrative Review | AMSTAR 2 | Good | Generalizability | Gut microbiome in atherosclerosis. |
| Kasartzian & Tsiampalis 2025  (71) | Review Article | AMSTAR 2 | Good | No major concerns | Multimodal AI in CVD. |

AF: Atrial Fibrillation; AMSTAR 2: A Measurement Tool to Assess systematic Reviews; AUC: Area Under the Curve; CXR: Chest X-ray; DCNN: Deep Convolutional Neural Network; DL: Deep Learning; ECG: Electrocardiogram; GAN: Generative Adversarial Network; HF: Heart Failure; MI: Myocardial Infarction; NOS: Newcastle-Ottawa Scale; PPG: Photoplethysmography; PSO-ANN: Particle Swarm Optimization - Artificial Neural Network; RoB 2: Cochrane Risk of Bias 2 tool; SHAP: SHapley Additive exPlanations; TAVR: Transcatheter Aortic Valve Replacement; XAI: Explainable Artificial Intelligence

NOS: Score range: 0–9; higher scores indicate better quality.

RoB 2: Rratings: Low risk / Some concerns / High risk.

AMSTAR 2: Ratings: High / Moderate / Low / Critically low confidence – used for reviews/meta-analyses.

.
